# Supplementary material for: Continuities and Changes in the Friendships of Children with and Without ADHD: A Longitudinal, Observational Study
Source: Springer Nature journal article supplement (doi:10.1007/s10802-013-9753-9), 2013-06-05
Supplement: MOESM1 [file 541448]

**Electronic Appendix**

**Supplementary Appendix 1.**

Although the affect indices described in the Method section permit parsimony in the analyses, they may obscure potential differences in affect frequency or intensity. Therefore, we conducted additional analyses of variance with the 6 original positive and negative affect scores (see Table 2 for explanation of affect codes) X 3 observational tasks X 3 target participants (i.e., referred child, invited friend, or dyad) X 2 time points = 108 ANOVAs.

Among these supplementary analyses, the following 10 ANOVAs were the only significant ones: At Time 1, ADHD dyads exhibited more “positive affect 3” than comparison dyads in the card-sharing task: M ADHD dyads=0.25 (*SD*=0.78), *M* comparison dyads=0.00 (*SD*=0.00), *F*1,131=4.85, *p*=0.03. However, referred children with ADHD showed less “positive affect 1” than comparison children in the game-choice task: *M* ADHD=2.23 (*SD*=2.51), *M* comparison=3.63 (*SD*=3.06), *F*1,131=8.02, *p*= 0.01. The friends of referred children with ADHD manifested less “positive affect 1” than the friends of comparison children in the game-choice task: *M* ADHD friends=2.05 (*SD*=1.85), *M* comparison friends=3.35 (*SD*=2.86), *F*1,131=10.06, *p*= 0.00. At the dyadic level, ADHD dyads were also characterized by less “positive affect 1” than comparison dyads in the game-choice task: *M* ADHD dyads=2.14 (*SD*=1.80), *M* comparison dyads=3.49 (*SD*=2.45), *F*1,131=13.12, *p*= 0.03. Similarly, the friends of referred children with ADHD exhibited less “positive affect 2” than the friends of comparison children in the game-choice task: *M* ADHD friends=0.75 (*SD*=1.36), *M* comparison friends=1.61 (*SD*=2.71), *F*1,131=5.80, *p*= 0.02. At the dyadic level, ADHD dyads also exhibited less “positive affect 2” than comparison dyads in the game-choice task: *M* ADHD dyads=0.76 (*SD*=1.25), *M* comparison dyads=1.38 (*SD*=2.22), *F*1,131=4.28, *p*= 0.04. In the car-race task, ADHD dyads also exhibited less “positive affect 1” than comparison dyads: *M* ADHD dyads=7.45 (*SD*=3.94), *M* comparison dyads=9.09 (*SD*=3.84), *F*1,131=5.30, *p*= 0.02. However, ADHD dyads exhibited more “negative affect 1” than comparison dyads during this task: M ADHD dyads=0.46 (SD=1.30), M comparison dyads=0.04 (SD=0.21), F1,131=4.63, p= 0.03.

There were only two significant differences at Time 2: referred children with ADHD exhibited less “positive affect 2” than comparison children in the game-choice task: M ADHD=0.68 (*SD*=1.19), *M* comparison=1.43 (*SD*=2.41), *F*1,105=4.61, *p*= 0.03. ADHD dyads also exhibited less “positive affect 2” than comparison dyads in this task at Time 2: *M* ADHD dyads=0.71 (*SD*=0.97), *M* comparison dyads=1.38 (*SD*=2.00), *F*1,105=5.40, *p*= 0.02. These significant findings occurred unsystematically at different levels of negative and positive intensity and are thus not conclusive with regard to the question of whether there were differences in affect mainly in terms of frequency or intensity.

**Supplementary Table 1.**

***Zero-Order Pearson Correlations Between the Study Variables for Referred Children at Time 1 and Time 2***

|  | 1 | 2 | 3 | 4 | 5 | 6 | 7 | 8 | 9 | 10 | 11 | 12 | 13 | 14 | 15 |
| --- | --- | --- | --- | --- | --- | --- | --- | --- | --- | --- | --- | --- | --- | --- | --- |
| 1. FQM Positive FF |  | .03 | .25* | -.30** | -.08 | -.11 | -.04 | .11 | -.05 | -.07 | a | .04 | .10 | .01 | a |
| 2. FQM Negative FF | -.33*** |  | -.21* | .15 | -.07 | .13 | .13 | -.11 | .06 | -.03 | a | .11 | .33*** | -.05 | a |
| 3. Friendship Satisfaction | .50*** | -.37*** |  | -.06 | .02 | -.19* | -.19* | .11 | -.09 | .04 | a | -.13 | -.13 | .02 | a |
| 4. Illegal maneuvers (car-race task) | -.13 | .11 | -.05 |  | .33*** | .61*** | .52*** | -.31** | .18b | -.05 | a | .37*** | .12 | .20* | a |
| 5. Negative affect (car-race task) | .04 | -.09 | -.08 | .13 |  | .40*** | .38*** | -.14 | .15 | .00 | a | .22* | -.04 | .15 | a |
| 6. Self-centered proposals (card-sharing task) | .01 | .01 | .07 | .07 | .04 |  | .60*** | -.38*** | .16 | -.13 | a | .44*** | .06 | .15 | a |
| 7. Insensitive proposals (card-sharing task) | -.12 | .16b | -.11 | .21* | .08 | .20* |  | -.34*** | -.01 | -.33*** | a | .43*** | .11 | .31** | a |
| 8. Preference inquiries (card-sharing task) | .03 | -.06 | -.08 | .03 | -.07 | -.05 | -.11 |  | -.21* | .11 | a | -.13 | .04 | .13 | a |
| 9. Refusals (card-sharing task) | -.08 | .16b | .01 | .17* | -.03 | .01 | .46*** | -.11 |  | .08 | a | -.07 | .07 | -.03 | a |
| 10. BoP (card-sharing task) | .09 | -.12 | .07 | -.28** | -.12 | -.18* | -.20* | -.02 | -.08 |  | a | -.01 | .08 | -.08 | a |
| 11. Negative affect (card-sharing task) | -.27** | .15 | -.50*** | -.02 | .15 | -.05 | .01 | .00 | -.06 | -.12 |  | a | a | a | a |
| 12. Insensitive proposals (game-choice task) | -.22* | .12 | -.25** | .18* | .11 | -.10 | .17 | -.08 | .25** | -.04 | .31*** |  | .06 | .08 | a |
| 13. Preference inquiries (game-choice task) | .13 | -.06 | .09 | .04 | .05 | -.06 | -.07 | .12 | .04 | .06 | -.06 | -.01 |  | -.03 | a |
| 14. Refusals (game-choice task) | -.24** | .21* | -.25** | .26** | .00 | .02 | .21* | .03 | .12 | -.22* | .09 | .18* | .11 |  | a |
| 15. Negative affect (game-choice task) | -.27** | .15 | -.50*** | -.02 | .15 | -.05 | .01 | .00 | -.06 | -.12 | 1.00 | .31*** | -.06 | .09 |  |

*Note*.

FQM = Friendship Qualities Measure; FF= friendship features; BoP= Balance of Power; Observational variables reported represent arcsine-transformed proportions, see Data analytic strategy section for more details. Time 1 data (*n*=133) appear below diagonal whereas Time 2 data (*n*=107) appear above diagonal.

a correlations cannot be computed because negative affect is constant (0% of negative affect coded in these tasks at Time 2).

b *p* < .07; * *p* < .05; ** *p* < .01; *** *p* < .001.
